# Supplementary material for: Maternal and early postnatal immune activation produce sex-specific effects on autism-like behaviors and neuroimmune function in mice
Source: PubMed Central journal article supplement (PMC6858355; doi:10.1038/s41598-019-53294-z), 2019-11-15

## Supplementary Information

### **Maternal and early postnatal immune activation produce sex-specific effects on autism-like behaviors and neuroimmune function in mice.**

William A. Carlezon Jr, Woori Kim, Galen Missig, Beate C. Finger, Samantha M. Landino, Abigail J. Alexander, Emery L. Mokler, James O. Robbins, Yan Li, Vadim Y. Bolshakov, Christopher J. McDougale, Kwang-Soo Kim

**Fig. S1** Correlation between mRNA and protein expression levels of pro-inflammatory markers (A) IL-6 and (B) IL-1 $\beta$  in the brains of male and female mice. Pearson linear correlation coefficients  $R^2$  and their  $P$  values are indicated in the graph.

**Fig. S2** Correlation between mRNA and protein expression levels of neuroinflammation markers (A) Iba-1, (B) GFAP and (C) TSPO in the brains of male and female mice. Pearson linear correlation coefficients  $R^2$  and their  $P$  values are indicated in the graph.

**Fig. S3** Correlation between mRNA and protein expression levels of anti-inflammatory markers (A) IL-10 and (B) TGF- $\beta$ 1 in the brains of male and female mice. Pearson linear correlation coefficients  $R^2$  and their  $P$  values are indicated in the graph.

**Fig. S4** Full length western blots for each of the proteins analyzed including 1) IL-6, 2) IBA-1, 3) GFAP, 4) TSPO, 5) IL-10, 6) TGF- $\beta$ 1, 7)  $\beta$ -actin. Red selection indicates the representative western blots displayed in **Fig. 8,10,12**.

# Supplemental Figure S1

## A) IL-6

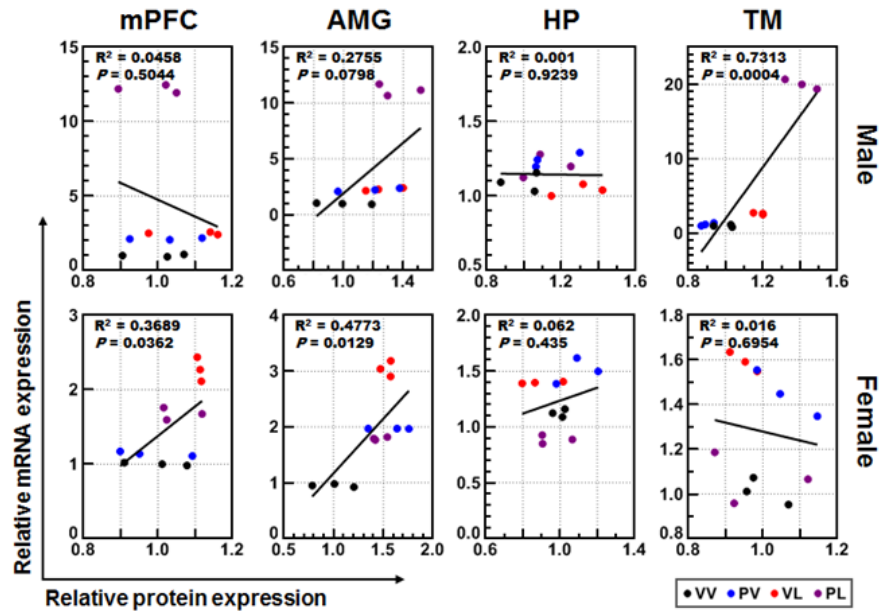

## B) IL-1 $\beta$

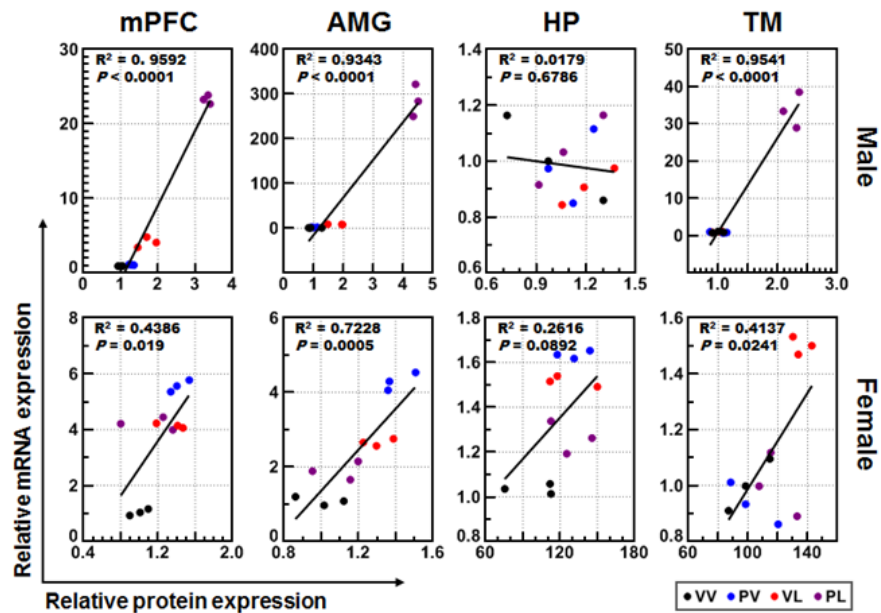

# Supplemental Figure S2

## A) Iba-1

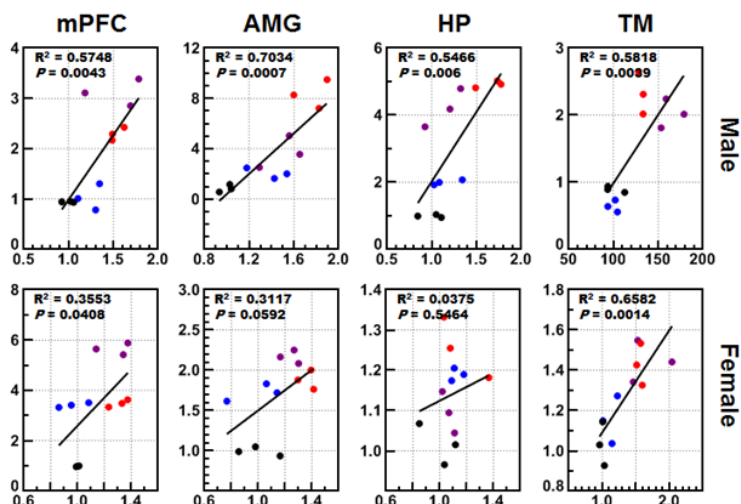

## B) GFAP

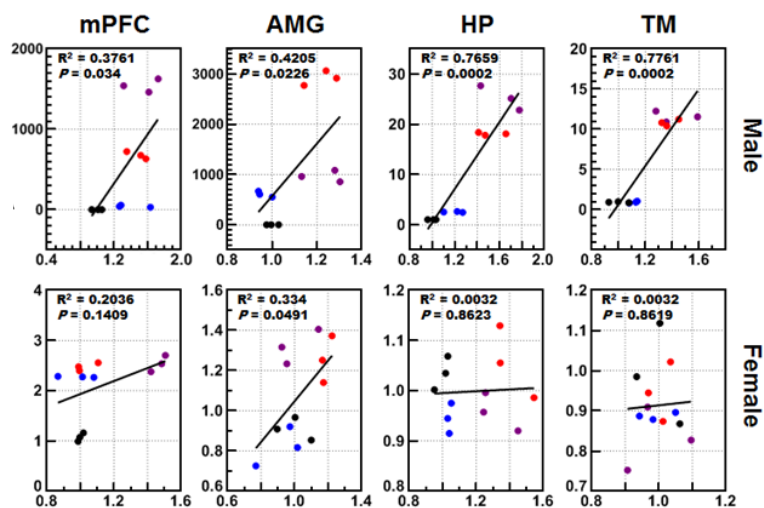

## C) TSPO

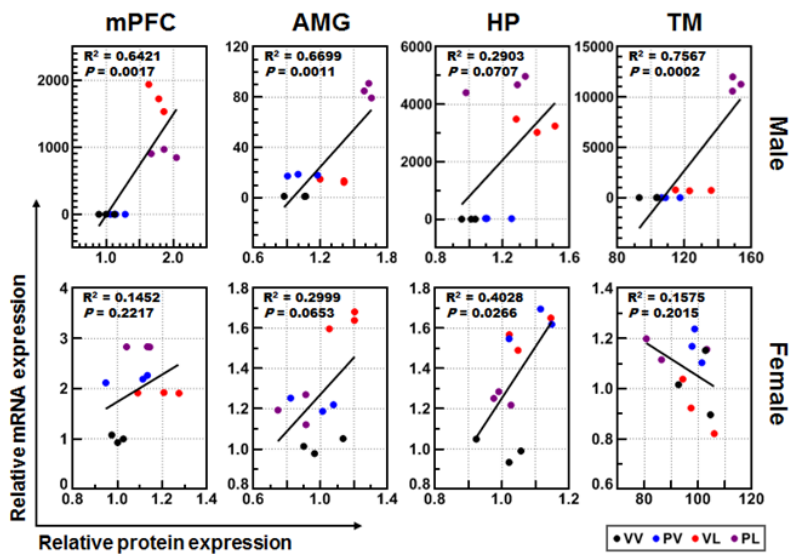

# Supplemental Figure S3

## A) IL-10

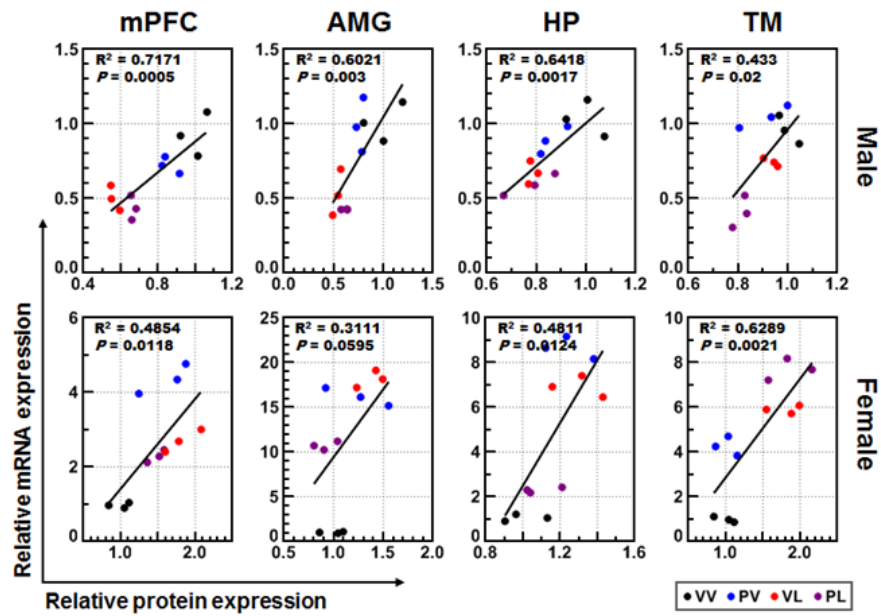

## B) TGF- $\beta$ 1

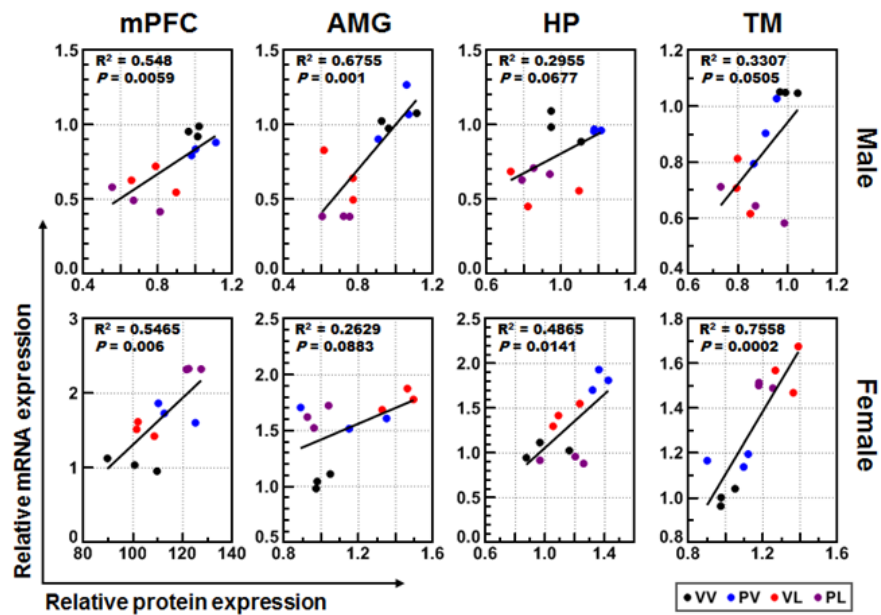

# 1. IL-6

## Male

### mPFC

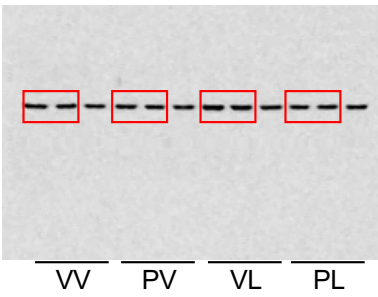

### AMG

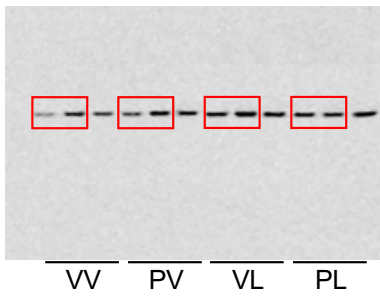

### HP

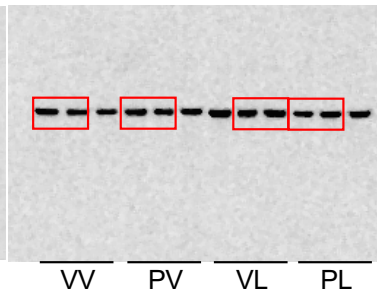

### TM

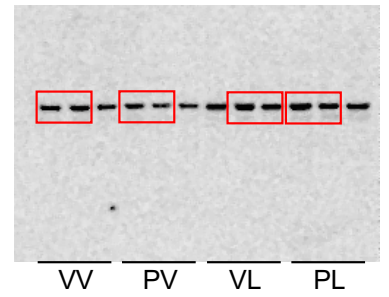

## Female

### mPFC

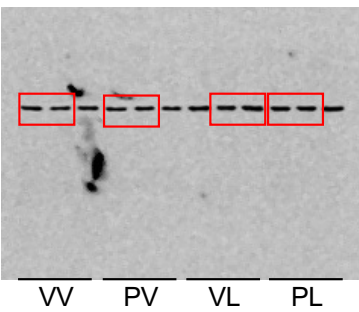

### AMG

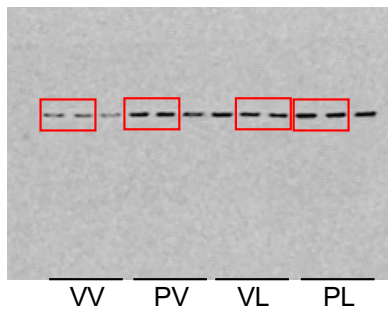

### HP

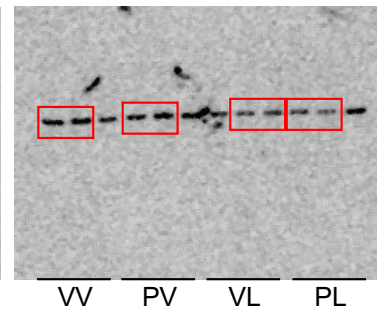

### TM

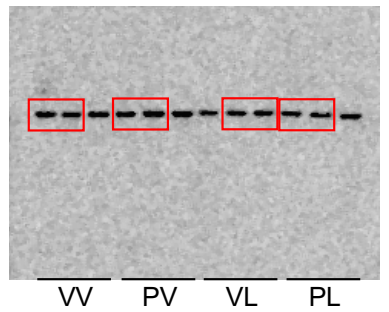

## 2. Iba-1

### Male

#### mPFC

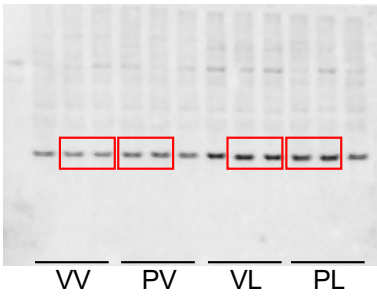

#### AMG

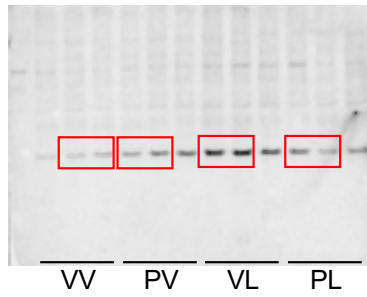

#### HP

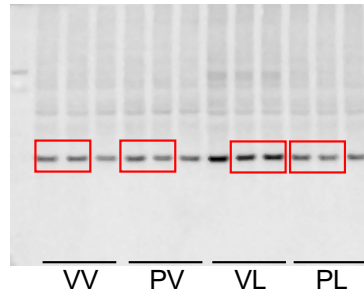

#### TM

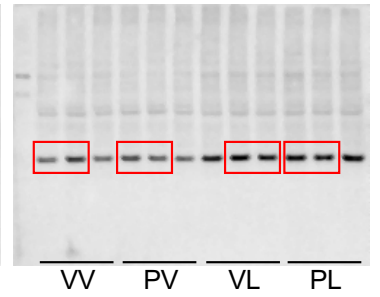

### Female

#### mPFC

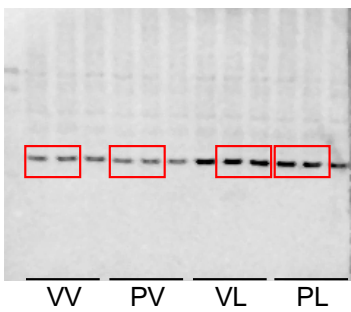

#### AMG

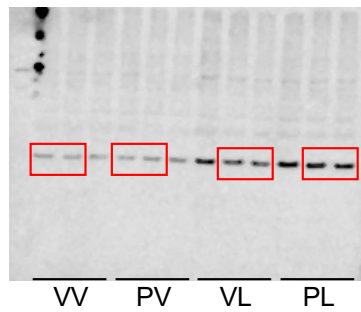

#### HP

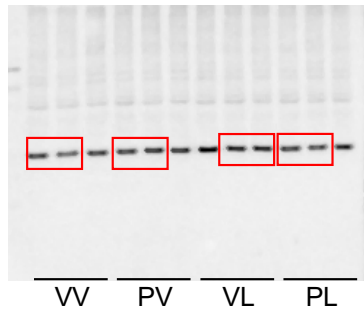

#### TM

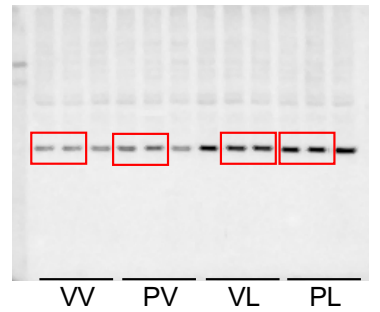

### 3. GFAP

#### Male

##### mPFC

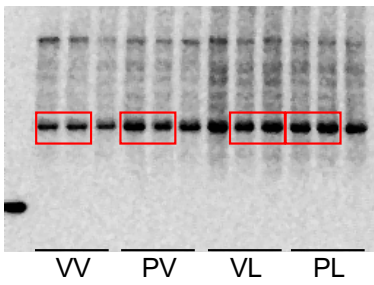

##### AMG

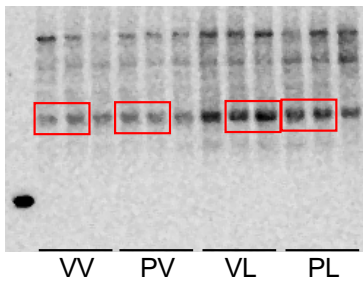

##### HP

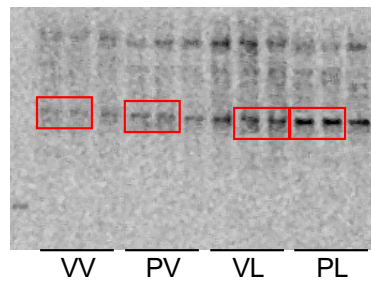

##### TM

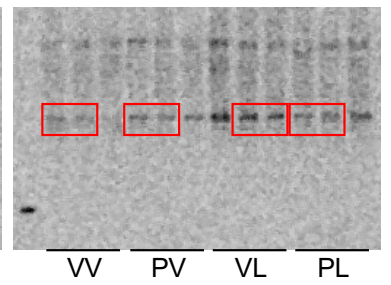

#### Female

##### mPFC

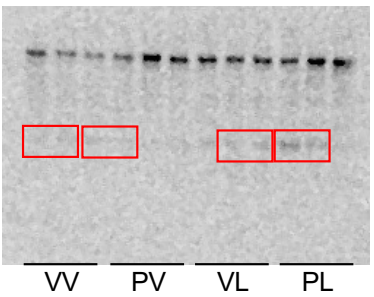

##### AMG

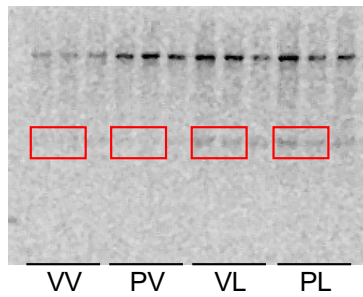

##### HP

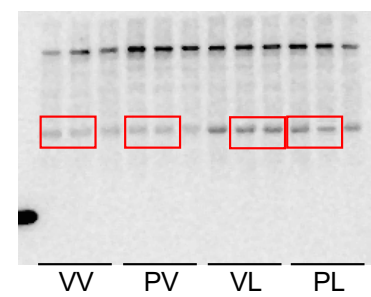

##### TM

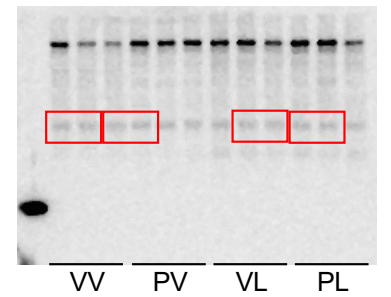

# 4. TSPO

## Male

**mPFC**

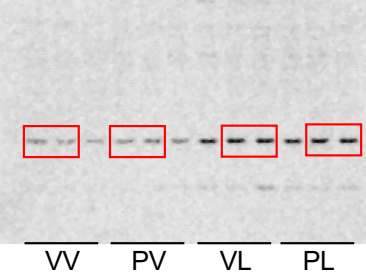

**AMG**

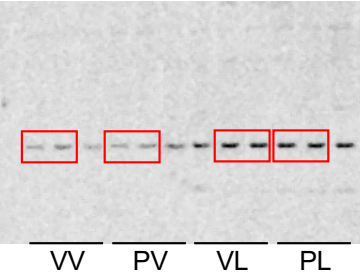

**HP**

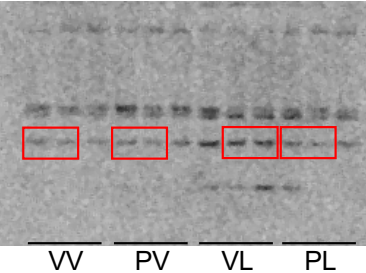

**TM**

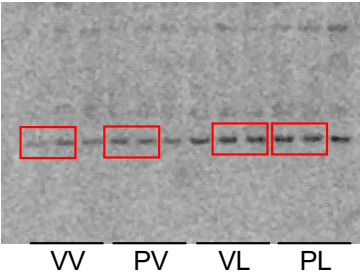

## Female

**mPFC**

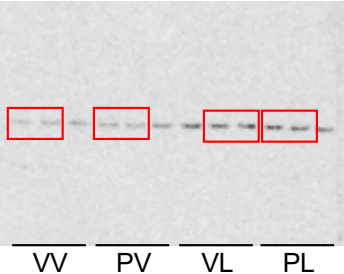

**AMG**

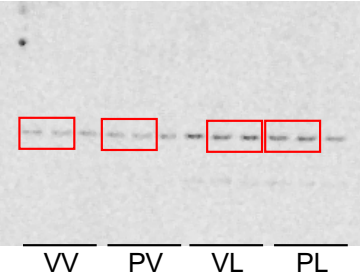

**HP**

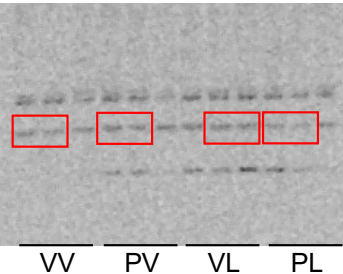

**TM**

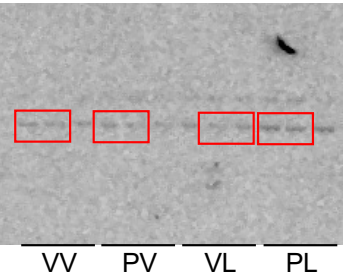



## 5. IL-10

### Male

#### mPFC

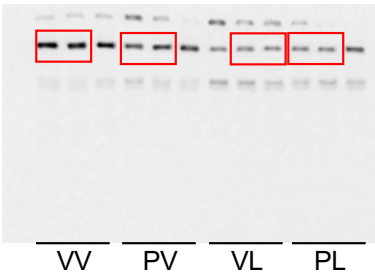

#### AMG

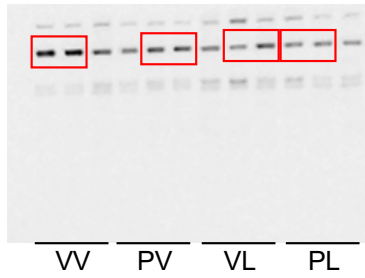

#### HP

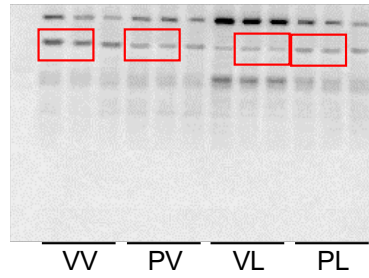

#### TM

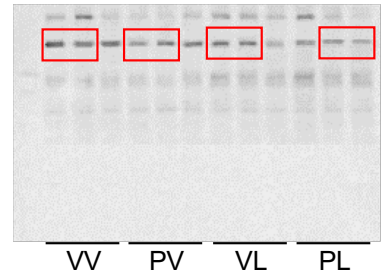

### Female

#### mPFC

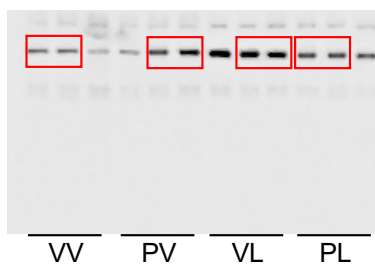

#### AMG

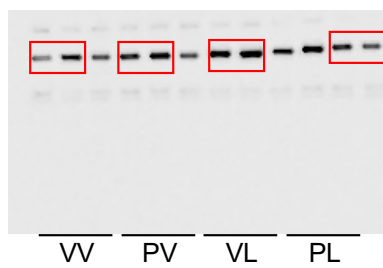

#### HP

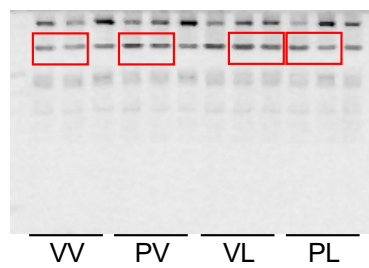

#### TM

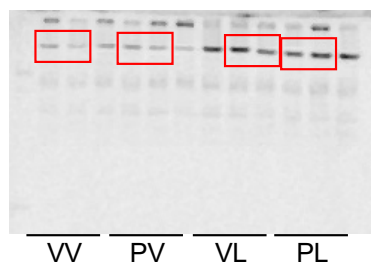

# 6.TGF- $\beta$ 1

## Male

### mPFC

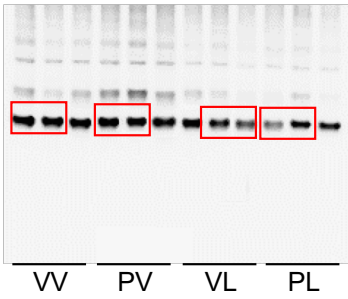

### AMG

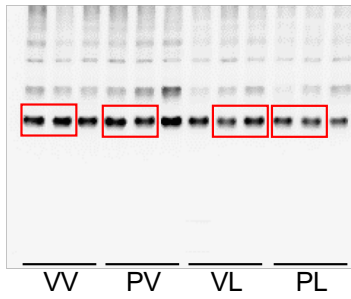

### HP

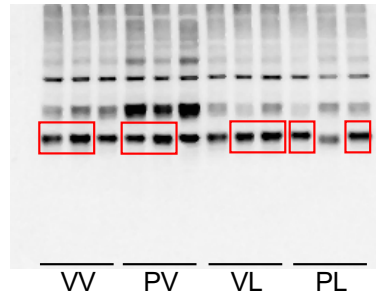

### TM

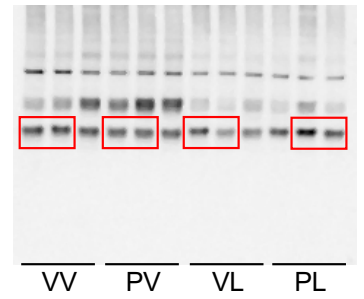

## Female

### mPFC

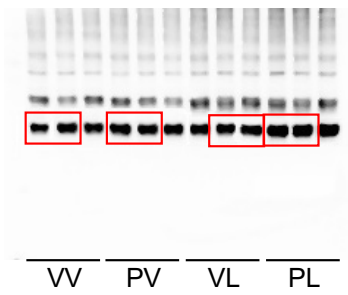

### AMG

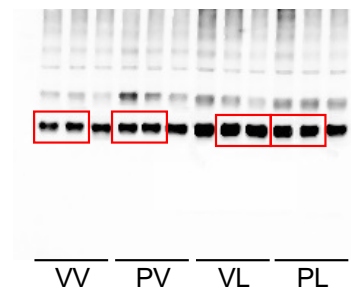

### HP

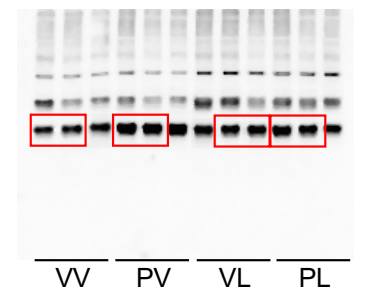

### TM

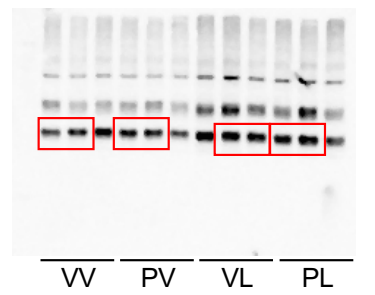

## 7. $\beta$ -actin

### Male

#### mPFC

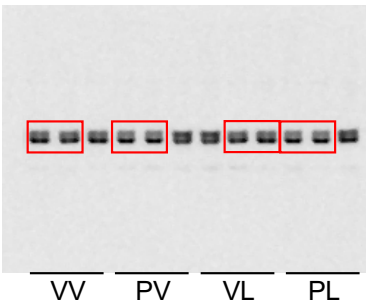

#### AMG

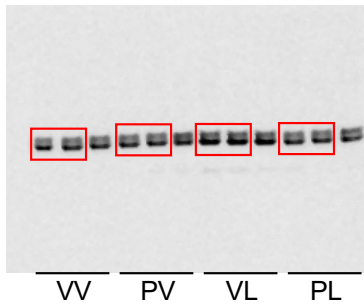

#### HP

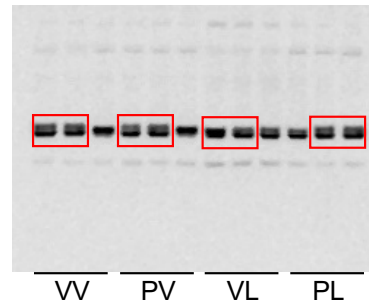

#### TM

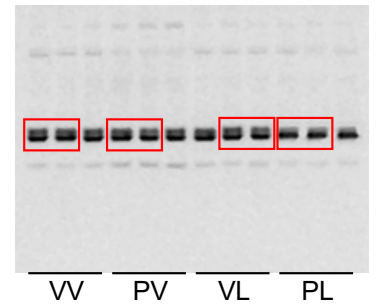

### Female

#### mPFC

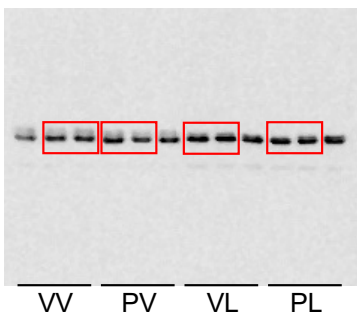

#### AMG

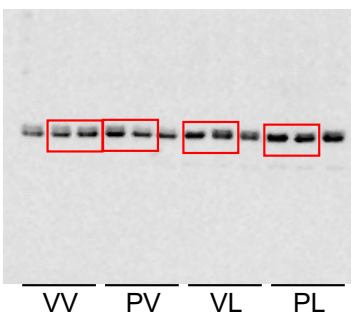

#### HP

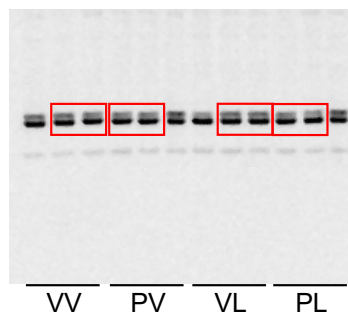

#### TM

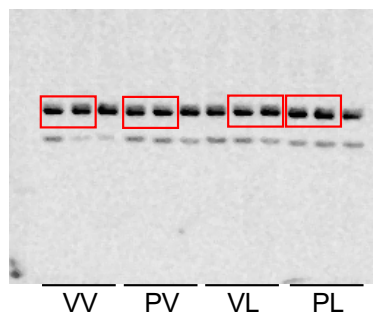

Supplement: 41598_2019_53294_MOESM1_ESM.pdf [file 41598_2019_53294_MOESM1_ESM.pdf]
